# Supplementary material
Source: PubMed Central journal article supplement (PMC5310166)

# China

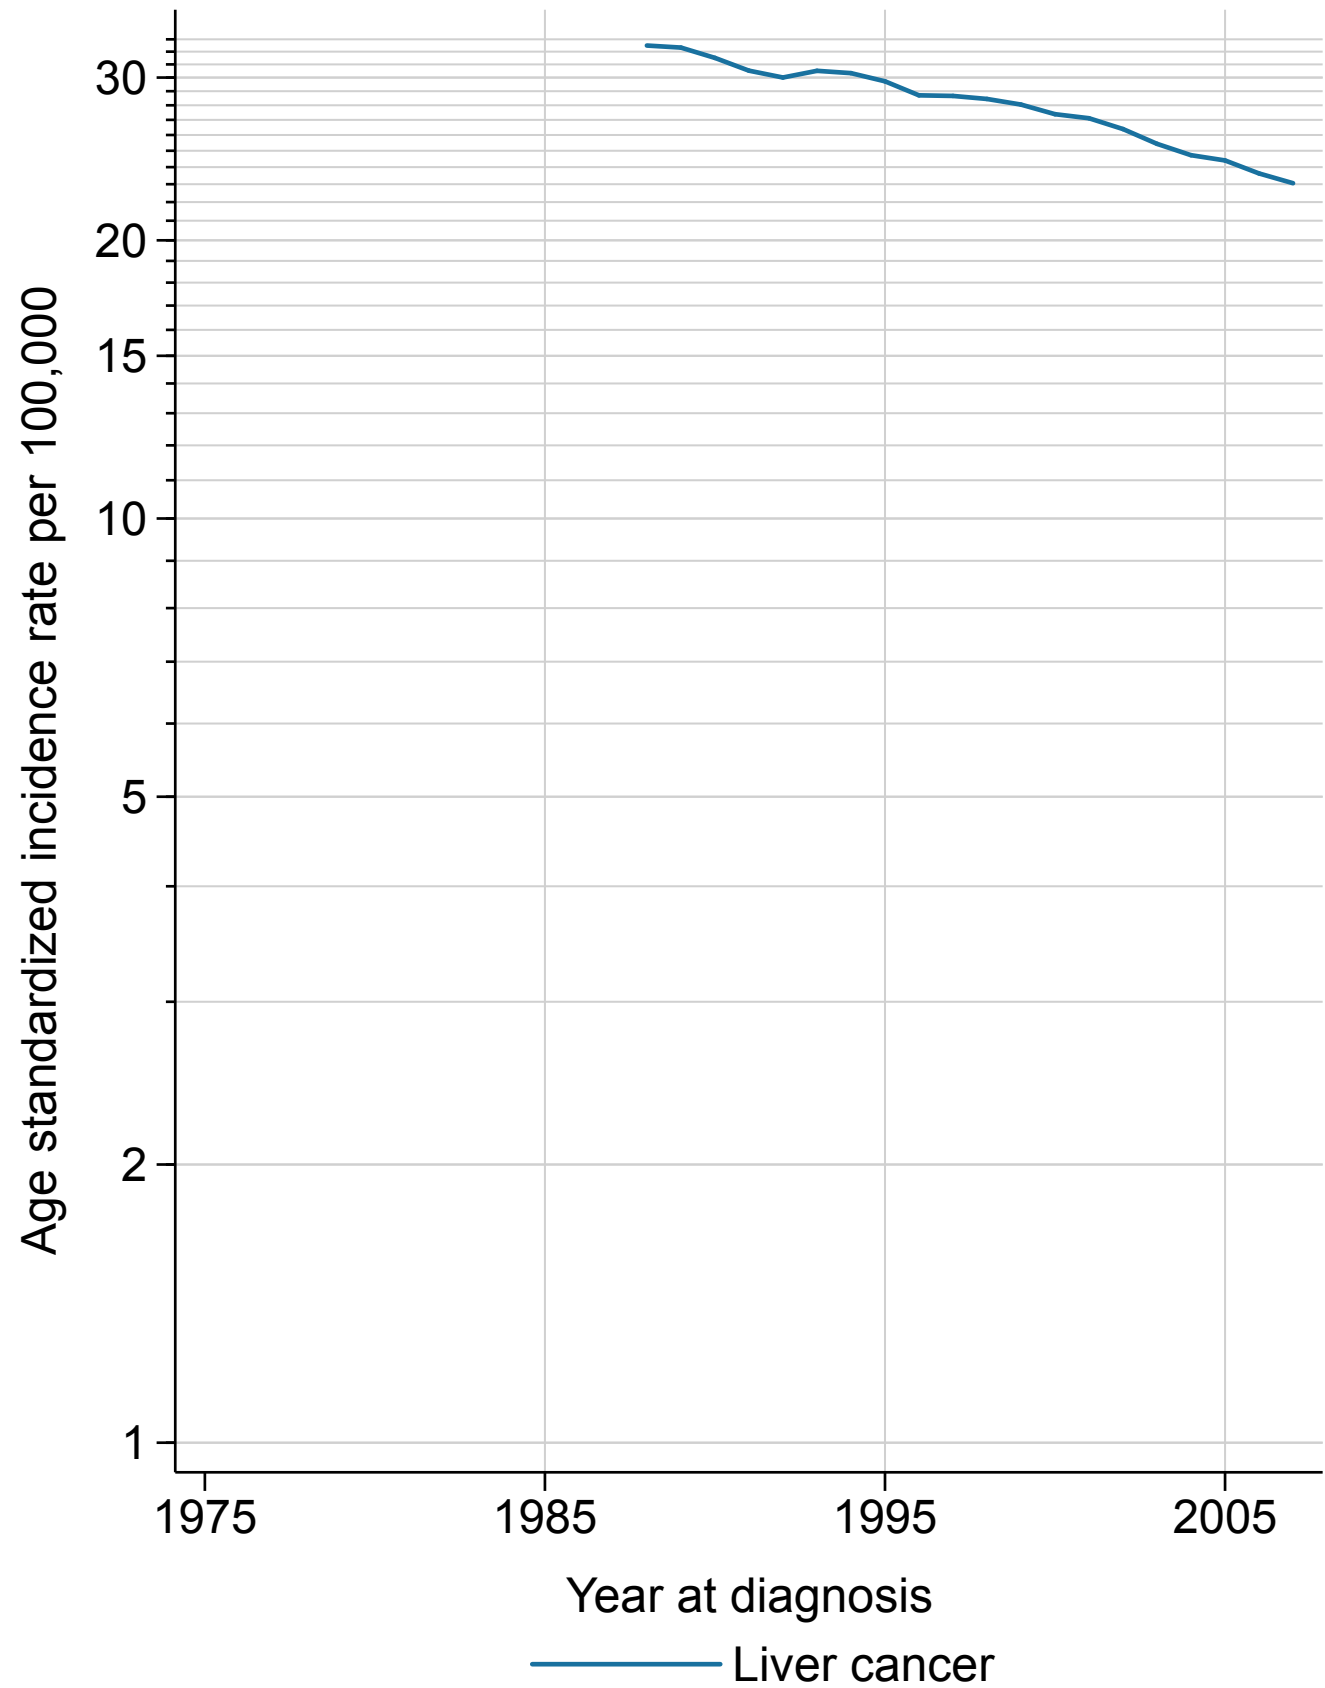

Supplement: NIHMS844766-supplement-Figure_S5.pdf [file NIHMS844766-supplement-Figure_S5.pdf]

# China

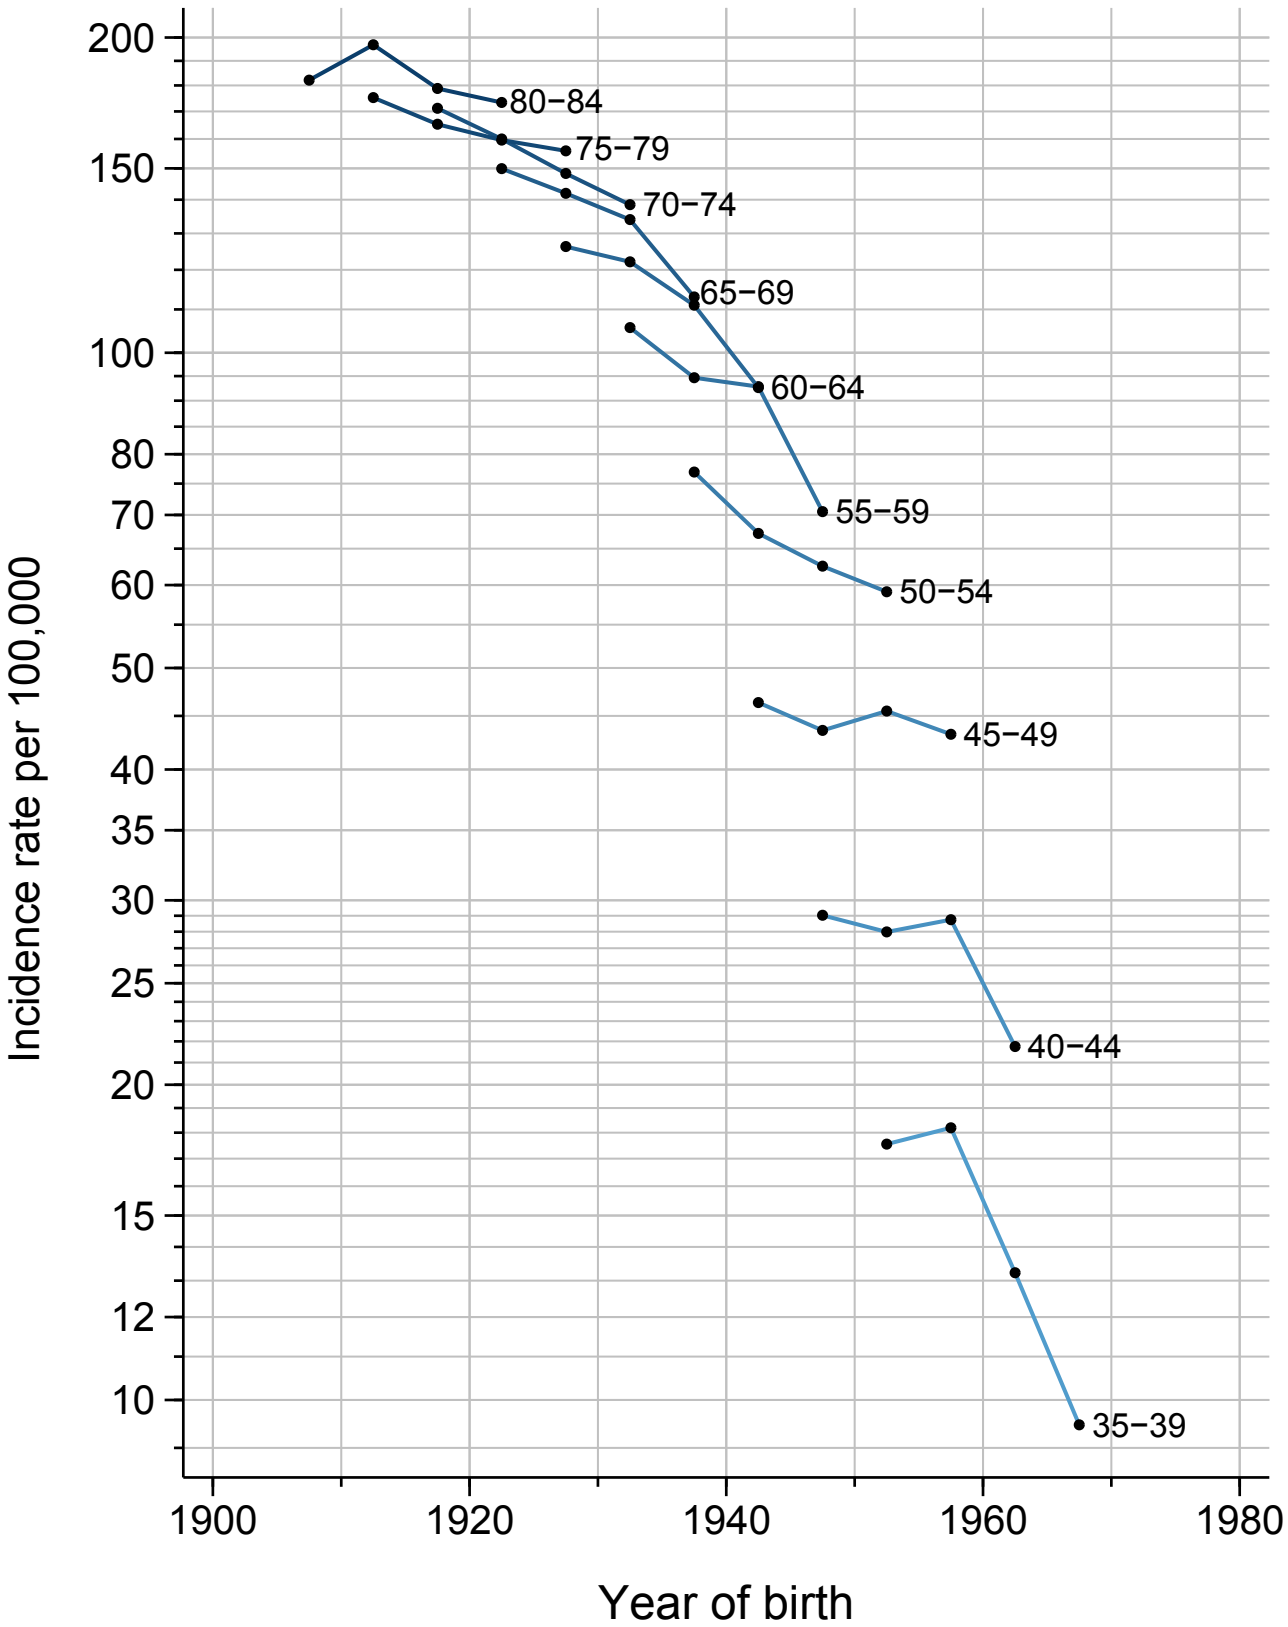

Supplement: NIHMS844766-supplement-Figure_S6.pdf [file NIHMS844766-supplement-Figure_S6.pdf]

# China

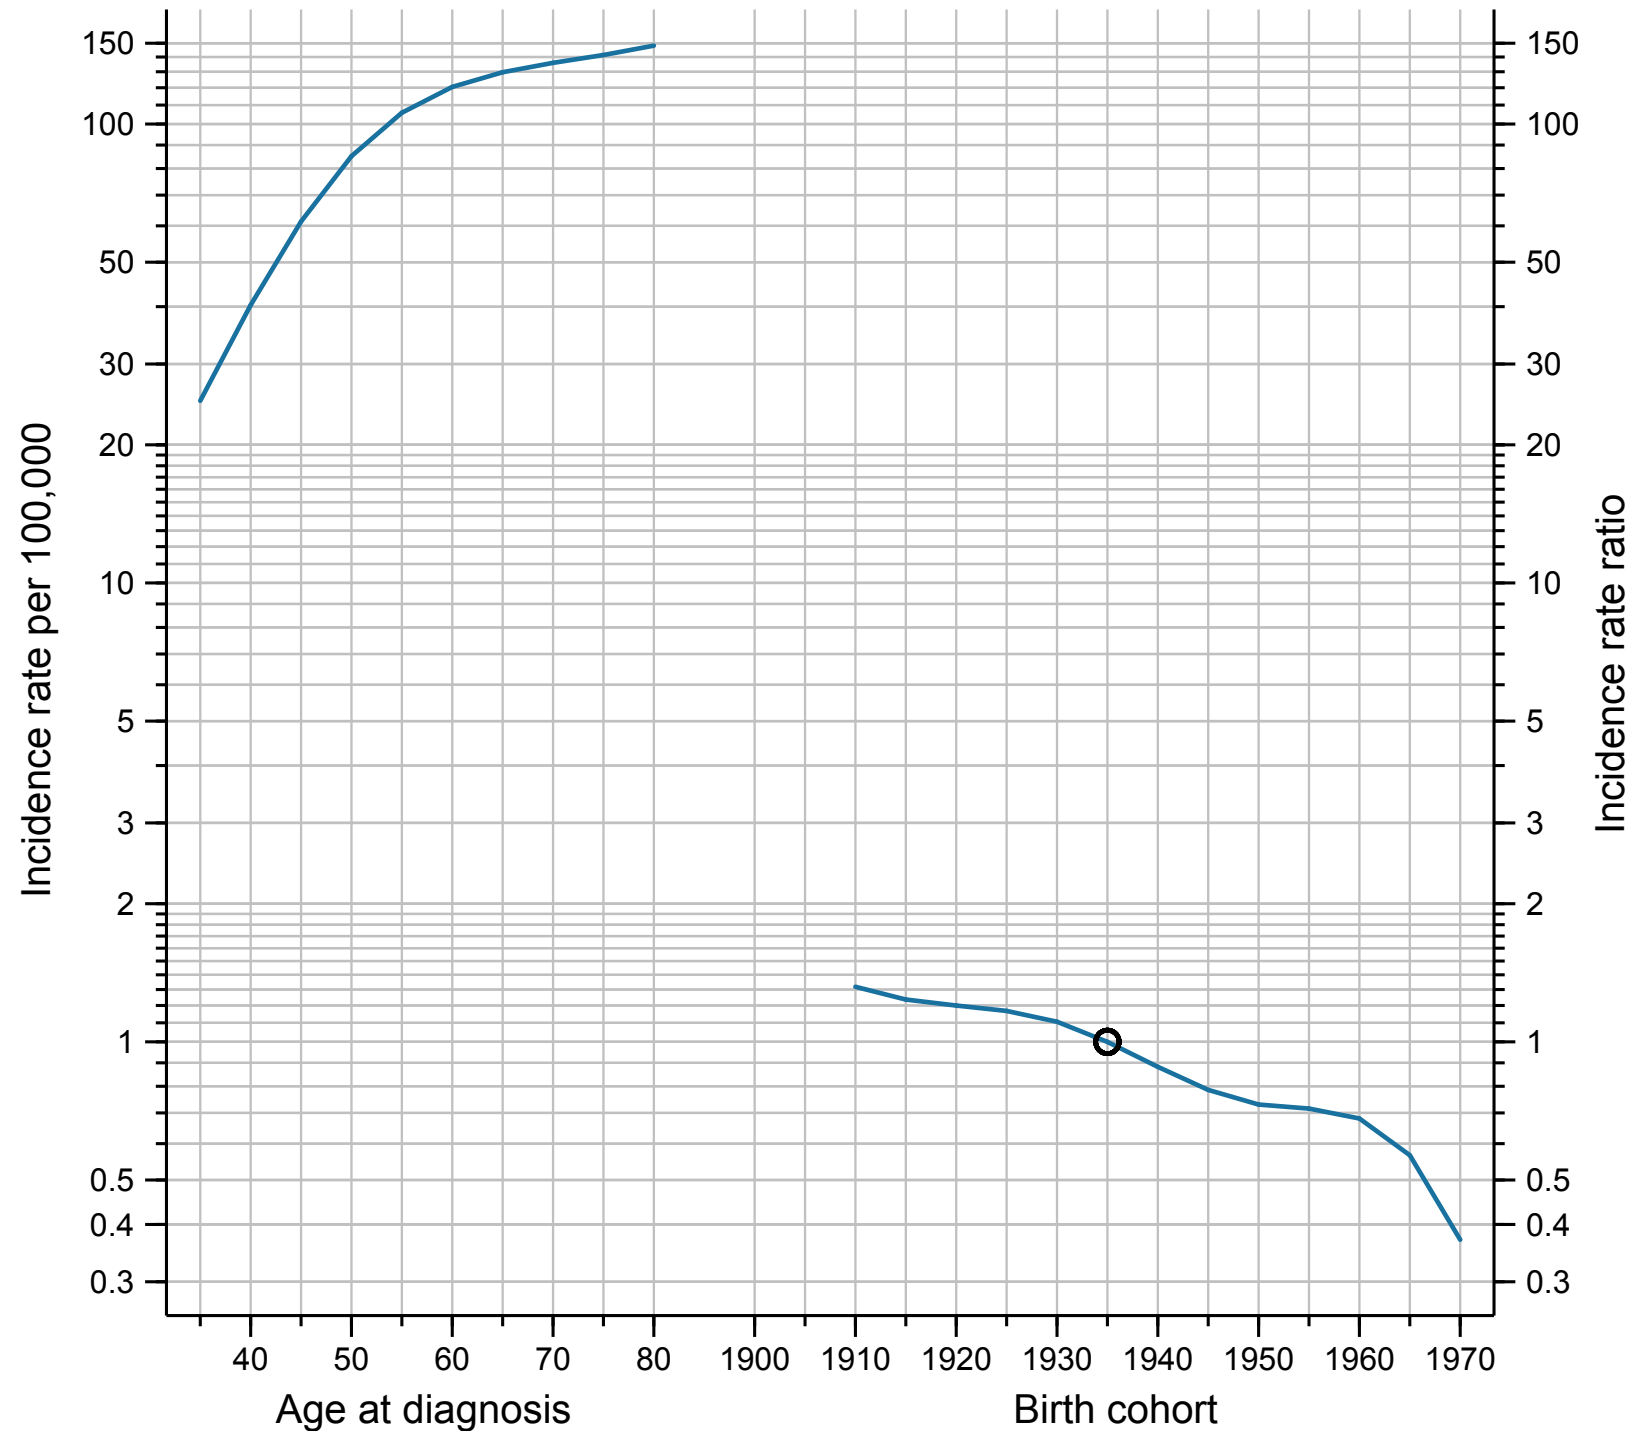

— Liver cancer

Supplement: NIHMS844766-supplement-Figure_S7.pdf [file NIHMS844766-supplement-Figure_S7.pdf]
